# Supplementary material
Source: PubMed Central journal article supplement (PMC9199051)
Supplement: OrregoSuppApps.pdf [file OrregoSuppApps.pdf]

Supplemental materials for

Orrego C, Perestelo-Pérez L, González-González A, et al. A virtual community of practice to improve primary health care professionals' attitudes towards patient empowerment (e-MPODERA): a cluster-randomized trial. *Ann Fam Med*. 2022;20(3):204-210.

### **Supplemental Appendix 1. Sample size specifications**

In order to detect a between-group difference of 0.2 points in the primary outcome (PPOS), assuming a standard deviation of 0.50 (Hoffmann, Bennett, Tomsett, & Del Mar, 2014), an alpha error of 0.05, and a power of 80%, it was calculated that 200 healthcare professionals would be needed.

Due to the cluster design, we calculated an inflation factor using the formula  $IF = 1 + (m - 1)\rho$ , where  $m$  represents cluster size (we assumed an average of 5 professionals per practice), and  $\rho$  is the intraclass correlation coefficient, assumed to be 0.03, (Grimshaw, Elbourne, 2004)

Based on the resulting inflation factor of 1.12, the required sample size was increased to 224. To cover a loss to follow-up of 20% of patients over the 12 months, it was further increased to 270 (135 professionals per group) to be recruited from 54 practices (270/5). Healthcare professionals were expected to recruit 1,382 patients (assuming 20% loss to follow-up), which is the number required to detect a mean difference between groups of at least 4 points on the PAM at 12 months<sup>14</sup> based on the same assumptions for type I and II errors as those made for the professionals' sample calculation.

- Hoffmann TC, Bennett S, Tomsett C, Del Mar C. Brief training of student clinicians in shared decision making: A single-blind randomized controlled trial. *J Gen Intern Med*. 2014;29(6):844-849.  
doi:10.1007/s11606-014-2765-5

- Campbell MK, Grimshaw JM, Elbourne DR. Intraclass correlation coefficients in cluster randomized trials: empirical insights into how should they be reported. *BMC Med Res Methodol.* 2004;4:9. doi:10.1186/1471-2288-4-9

**Supplemental Tables 1 and 2. Predictors of losses and professionals' activity in the vCoP.**

| Supplemental Table 1. Predictors of Losses at Follow-Up |                                |                                        |                            |
|---------------------------------------------------------|--------------------------------|----------------------------------------|----------------------------|
| <b>Professionals</b>                                    | <b>Completers<br/>n = 253</b>  | <b>Dropouts<br/>n = 68<br/>(21.2%)</b> | <b>P-value<sup>1</sup></b> |
| Intervention group, n (%)                               | 134 (53.0%)                    | 49 (72.0%)                             | 0.025                      |
| Nurses, n (%)                                           | 83 (45.4%)                     | 48 (34.8%)                             | 0.639                      |
| Age, mean (SD)                                          | 47.4 (8.44)                    | 49.9 (9.95)                            | 0.131                      |
| Female, n (%)                                           | 141 (77.0%)                    | 102 (73.9%)                            | 0.524                      |
| Years of experience, mean (SD)                          | 21.5 (8.27)                    | 23.7 (10.6)                            | 0.053                      |
| Years in primary care, mean (SD)                        | 17.6 (8.54)                    | 18.1 (10.3)                            | 0.652                      |
| Daily caseload (n of patients, mean (SD))               | 30.0 (11.6)                    | 27.0 (9.84)                            | 0.157                      |
| PPOS Sharing                                            | 3.97 (0.72)                    | 3.77 (0.75)                            | 0.046                      |
| PPOS Caring                                             | 4.91 (0.52)                    | 4.74 (0.57)                            | 0.039                      |
| <b>Professionals (intervention group)</b>               | <b>Completers<br/>n = 134</b>  | <b>Dropouts<br/>n = 49<br/>(26.8%)</b> | <b>P-value<sup>1</sup></b> |
| Accessed to the platform at least once, n (%)           | 126 (94.0%)                    | 39 (79.6%)                             | 0.008                      |
| Number of logins, mean (SD)                             | 24.12 (32.5)                   | 6.88 (14.3)                            | 0.001                      |
| <b>Patients</b>                                         | <b>Completers<br/>n = 1442</b> | <b>Dropouts<br/>n = 479</b>            | <b>P-value<sup>1</sup></b> |

|                                                                                                                                                                                                                                                                                                                    |              |                |       |
|--------------------------------------------------------------------------------------------------------------------------------------------------------------------------------------------------------------------------------------------------------------------------------------------------------------------|--------------|----------------|-------|
|                                                                                                                                                                                                                                                                                                                    |              | <b>(24.9%)</b> |       |
| Intervention group, n (%)                                                                                                                                                                                                                                                                                          | 764 (53.0%)  | 331 (69.1%)    | 0.301 |
| Age, mean (SD)                                                                                                                                                                                                                                                                                                     | 64.1 (12.4)  | 66.8 (12.0)    | 0.037 |
| Female, n (%)                                                                                                                                                                                                                                                                                                      | 748 (51.9%)  | 226 (47.2%)    | 0.503 |
| Secondary or University studies, n (%)                                                                                                                                                                                                                                                                             | 659 (45.7%)  | 211 (44.0%)    | 0.065 |
| Married/partner, n (%)                                                                                                                                                                                                                                                                                             | 1025 (71.1%) | 338 (70.6%)    | 0.447 |
| Living alone, n (%)                                                                                                                                                                                                                                                                                                | 220 (15.2%)  | 84 (17.5%)     | 0.662 |
| Born outside Spain, n (%)                                                                                                                                                                                                                                                                                          | 117 (8.1%)   | 54 (11.3%)     | 0.313 |
| Duration of main disease (years), mean (SD)                                                                                                                                                                                                                                                                        | 11.5 (7.40)  | 12.1 (7.23)    | 0.126 |
| PAM, mean (SD)                                                                                                                                                                                                                                                                                                     | 65.3 (15.3)  | 65.5 (21.4)    | 0.955 |
| <sup>1</sup> P-values from univariate multilevel logistic regression models, with random effects for primary care practice in the case of professionals, and for professional and primary care practice in the case of patients.<br>PAM: Patient Activation Measure; PPOS: Patient-Practitioner Orientation Scale. |              |                |       |

| Supplemental Table 2. Predictors of Professionals' Activity in the vCoP. |                                              |                                   |
|--------------------------------------------------------------------------|----------------------------------------------|-----------------------------------|
|                                                                          | <b>Access to the vCoP (yes/no) (n = 183)</b> | <b>Number of logins (n = 165)</b> |
|                                                                          | <b>B (95%CI); P-value</b>                    | <b>B (95%CI); P-value</b>         |
| Profession (nurse vs. physician)                                         | 0.86 (-0.29, 2.02); 0.145                    | -3.13 (-12.5, 6.20); 0.511        |
| Age                                                                      | 0.01 (-0.04, 0.07); 0.616                    | 0.21 (-0.32, 0.74); 0.434         |
| Sex                                                                      | 0.57 (-0.57, 1.71); 0.325                    | 1.73 (-9.55, 13.0); 0.764         |

|                       |                            |                            |
|-----------------------|----------------------------|----------------------------|
| Years of experience   | 0.02 (-0.04, 0.08); 0.558  | 0.21 (-0.34, 0.75); 0.458  |
| Years in primary care | 0.05 (-0.01, 0.12); 0.115  | -0.05 (-0.59, 0.48); 0.846 |
| Daily caseload        | -0.04 (-0.09, 0.01); 0.160 | -0.23 (-0.66, 0.21); 0.308 |
| PPOS Sharing          | 0.70 (-0.06, 1.46); 0.071  | 2.45 (-4.03, 8.94); 0.459  |
| PPOS Caring           | 1.06 (0.09, 2.03); 0.032   | 7.14 (-2.09, 16.4); 0.129  |

NOTE: Data are unstandardized coefficients (95%CI) and p-values from univariate multilevel logistic (access) or lineal (number of logins) regression models, with random effects for primary care practice.

PPOS: Patient-Practitioner Orientation Scale; vCoP: virtual community of practice.
